# Supplementary material for: Development of radiodetection systems towards miniaturised quality control of PET and SPECT radiopharmaceuticals
Source: Royal Society of Chemistry journal article supplement (doi:10.1039/c6lc00099a), 2016-01-01
Supplement: c6lc00099a1.pdf [file c6lc00099a1.pdf]

## Electronic Supplementary Information (ESI)

### Development of radiodetection systems towards miniaturised quality control of PET and SPECT radiopharmaceuticals

Matthew P. Taggart,<sup>a</sup> Mark D. Tarn,<sup>b,c</sup> Mohammad M. N. Esfahani,<sup>d</sup> Daniel M. Schofield,<sup>e</sup>  
Nathaniel J. Brown,<sup>d</sup> Stephen J. Archibald,<sup>b,c</sup> Tom Deakin,<sup>a,e</sup> Nicole Pamme<sup>c,§</sup> and  
Lee F. Thompson<sup>a,‡</sup>

<sup>a</sup> *Department of Physics and Astronomy, University of Sheffield, Hounsfield Road, Sheffield, S3 7RH, UK. E-mail: l.thompson@sheffield.ac.uk; Tel: +44 (0) 114 2224577; Fax: +44 (0) 114 2223555.*

<sup>b</sup> *Positron Emission Tomography Research Centre, University of Hull, Cottingham Road, Hull, HU6 7RX, UK.*

<sup>c</sup> *Department of Chemistry, University of Hull, Cottingham Road, Hull, HU6 7RX, UK. E-mail: n.pamme@hull.ac.uk; Tel: +44 (0) 1482 465027; Fax: +44 (0) 466410*

<sup>d</sup> *School of Engineering, University of Hull, Cottingham Road, Hull, HU6 7RX, UK.*

<sup>e</sup> *LabLogic Systems Ltd., Paradigm House, 3 Melbourne Avenue, Broomhill, Sheffield, S10 2QJ, UK.*

<sup>‡</sup> Corresponding author for radiodetection.

<sup>§</sup> Corresponding author for microfluidics.

#### Contents

|                                                                                               |         |
|-----------------------------------------------------------------------------------------------|---------|
| 1. SiPM detector design and setup ( <b>Fig. S1</b> )                                          | Page S2 |
| 2. <sup>22</sup> Na source for Geant4 penetrability simulation comparisons ( <b>Fig. S2</b> ) | Page S3 |
| 3. Effect of material type ( <b>Table S1</b> )                                                | Page S4 |
| 4. Effect of material thickness ( <b>Fig. S3</b> )                                            | Page S5 |
| 5. Material opacity study ( <b>Figs. S3 and S4</b> )                                          | Page S6 |
| 6. References                                                                                 | Page S7 |

## 1. SiPM detector design and setup

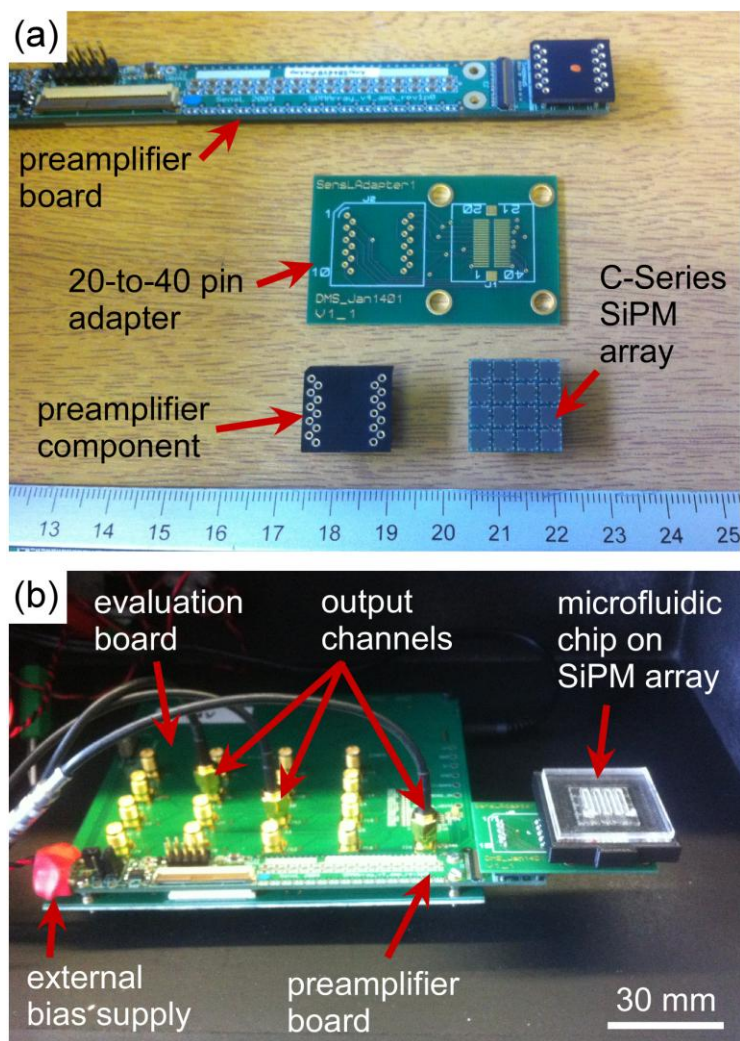

**Fig. S1** (a) Photograph of the disassembled SiPM setup, showing the various components of the platform including the ArraySB4-EVB-PreAmp preamplifier (SensL, Ireland), a C-Series MicroFC-SMA-30035 4x4 SiPM array (SensL), and an adapter board (LabLogic Systems Ltd., UK) to connect the two components. The scale is in millimetres. (b) Assembled SiPM platform with a microfluidic chip placed over the SiPM array, which was connected to an ArraySB4-EVB-PixOut evaluation board (SensL) via the preamplifier board. The output channels were selected by connecting the gold connectors on the evaluation board to a discriminator (CAEN N841) and quad scaler (CAEN N1145) system for counting. A bias voltage was supplied via an external power supply unit (Aim-TTi, UK).

## 2. $^{22}\text{Na}$ source for Geant4 penetrability simulation comparisons

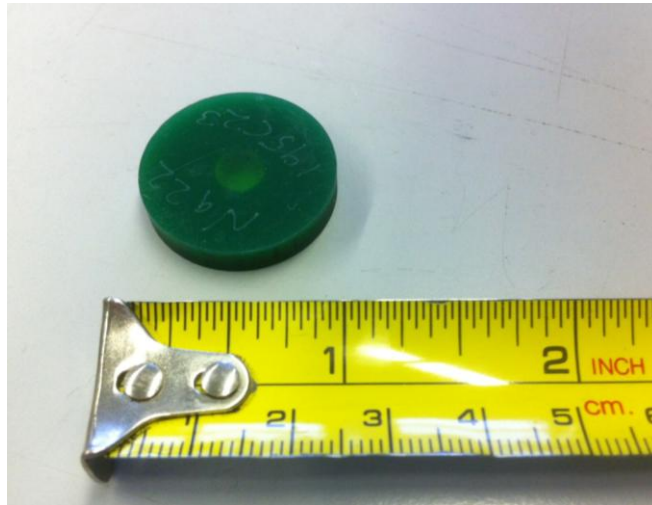

**Fig. S2** The standard  $^{22}\text{Na}$  disk source used as a positron emitter (546 keV positron energy) source, providing the anti-parallel 511 keV annihilation  $\gamma$  rays used to initially test the SiPM setup, and to compare to the Geant4 penetrability simulations.

### 3. Effect of material type

**Table S1** Physical properties of the substrates selected for studies in this work.

| <b>Substrate</b>            | <b>Density<br/>(g cm<sup>-3</sup>)</b> | <b>Refractive<br/>index</b> | <b>Composition</b>                                                                                                                                                                     | <b>References</b> |
|-----------------------------|----------------------------------------|-----------------------------|----------------------------------------------------------------------------------------------------------------------------------------------------------------------------------------|-------------------|
| <b>B270 crown<br/>glass</b> | 2.55                                   | 1.523                       | SiO <sub>2</sub> (69.1 %)<br>B <sub>2</sub> O <sub>3</sub> (10.8 %)<br>BaO (3.1 %)<br>Na <sub>2</sub> O (10.4 %)<br>K <sub>2</sub> O (6.3 %)<br>As <sub>2</sub> O <sub>3</sub> (0.4 %) | [1]               |
| <b>Soda-lime<br/>glass</b>  | 2.52                                   | 1.518 -<br>1.520            | SiO <sub>2</sub> (70-73 %)<br>Na <sub>2</sub> O (14-16 %)<br>CaO (5-10 %)<br>MgO (3-4 %)<br>Al <sub>2</sub> O <sub>3</sub> (1 %)<br>K <sub>2</sub> O (0.5-1 %)                         | [2-4]             |
| <b>Borofloat<br/>glass</b>  | 2.20                                   | 1.469 -<br>1.480            | SiO <sub>2</sub> (81 %)<br>B <sub>2</sub> O <sub>3</sub> (13 %)<br>Al <sub>2</sub> O <sub>3</sub> (2 %)<br>Na <sub>2</sub> O/K <sub>2</sub> O (4 %)                                    | [5]               |
| <b>Polycarbonate</b>        | 1.20                                   | 1.584 -<br>1.586            | (C <sub>16</sub> H <sub>14</sub> O <sub>3</sub> ) <sub>n</sub>                                                                                                                         | [6]               |
| <b>PMMA</b>                 | 1.19                                   | 1.49                        | (C <sub>5</sub> H <sub>8</sub> O <sub>2</sub> ) <sub>n</sub>                                                                                                                           | [7]               |
| <b>PTFE</b>                 | 2.20                                   | 1.38                        | (C <sub>2</sub> F <sub>4</sub> ) <sub>n</sub>                                                                                                                                          | [8]               |

#### 4. Effect of material thickness

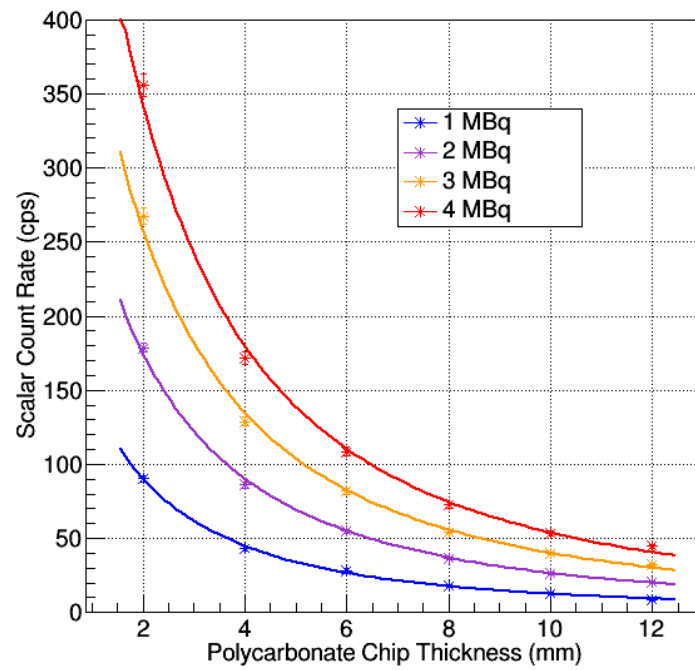

**Fig. S3** SiPM signal plotted against chip thickness at different levels of radioactivity. The data points were calculated from line equations obtained from Fig. 3b in the main paper.

## 5. Material opacity study

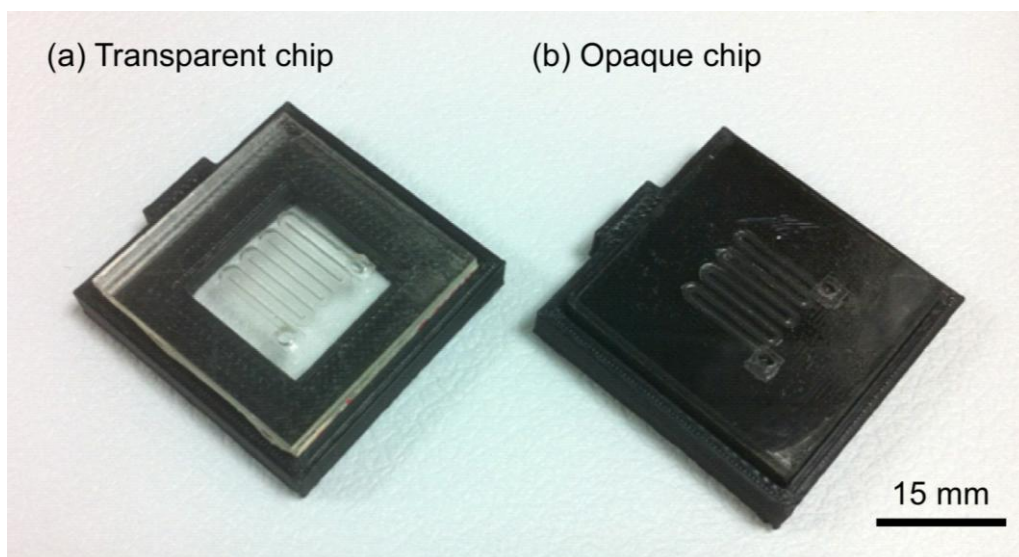

**Fig. S4** Microfluidic devices used for the material opacity study. The milled substrates shown were fabricated from 4 mm thick polycarbonate and are shown housed in their chip holders. (a) Transparent polycarbonate microfluidic chip. (b) Opaque polycarbonate chip with its underside spray-painted black, and a layer of black plastic between it and the SiPM array.

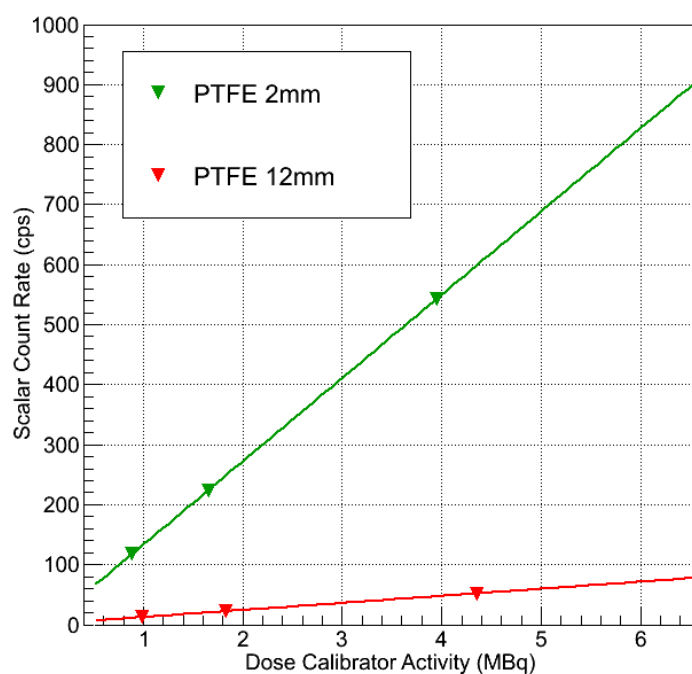

**Fig. S5** SiPM signals obtained from opaque PTFE substrates of 2 mm and 12 mm thicknesses, which contained 40  $\mu\text{L}$  of aqueous [ $^{18}\text{F}$ ]fluoride solution.

## 6. References

1. "Properties of B270 glass" webpage, GVB GmbH - Solutions in Glass (Herzogenrath, Germany) website: [http://www.g-v-b.de/File/Optische%20Materialien\\_e\(2\).pdf](http://www.g-v-b.de/File/Optische%20Materialien_e(2).pdf), accessed 2015.
2. "Substrate Material Specifications" data sheet, Nanofilm, Inc. (Westlake Village, CA, USA) website: <http://www.nanofilm.com/global/pdf/substrate-material.pdf>, accessed 2015.
3. "Chemistry of Glass" webpage, Corning Museum of Glass (Corning, NY, USA) website: <http://www.cmog.org/article/chemistry-glass>, accessed 2015.
4. "Composition and manufacture: Soda-lime-silicate" webpage, Saint-Gobain Glass UK Ltd. (Eggborough, UK) website: <http://uk.saint-gobain-glass.com/trade-customers/composition-and-manufacture>, accessed 2015.
5. "BOROFLOAT 33 - General Information" webpages, Schott North America, Inc. (Duryea, PA, USA) website: <http://www.us.schott.com/borofloat/english/index.html>, accessed 2015.
6. "Polycarbonate (PC) - Material Information" webpage, Goodfellow Cambridge Ltd. (Huntingdon, England) website: <http://www.goodfellow.com/A/Polycarbonate.html>, accessed 2015.
7. "Polymethylmethacrylate (PMMA, acrylic) - Material Information" webpage, Goodfellow Cambridge Ltd. (Huntingdon, England) website: <http://www.goodfellow.com/A/Polymethylmethacrylate.html>, accessed 2015.
8. "Polytetrafluoroethylene (PTFE) - Material Information" webpage, Goodfellow Cambridge Ltd. (Huntingdon, England) website: <http://www.goodfellow.com/E/Polytetrafluoroethylene.html>, accessed 2015.
